# Supplementary material for: The Roles of Mutation and Selection Acting on Mitochondrial Genomes Inferred from Intraspecific Variation in Seed Plants
Source: MDPI journal article supplement (doi:10.3390/genes13061036), 2022-06-09
Supplement: s1 [file s1]

Table S1 accession number of samples used in this study.

| <i>Ginkgo biloba</i> |            | <i>Arabidopsis thaliana</i> |            | <i>Oryza sativa</i> |            |
|----------------------|------------|-----------------------------|------------|---------------------|------------|
| SRR7648617           | SRR1945435 | SRR1945747                  | SRR1946059 | SRR1946371          | ERR2240124 |
| SRR7648618           | SRR1945436 | SRR1945748                  | SRR1946060 | SRR1946372          | ERR2240127 |
| SRR7648619           | SRR1945437 | SRR1945749                  | SRR1946061 | SRR1946373          | ERR2240128 |
| SRR7648620           | SRR1945438 | SRR1945750                  | SRR1946062 | SRR1946374          | ERR2241054 |
| SRR7648621           | SRR1945439 | SRR1945751                  | SRR1946063 | SRR1946375          | ERR2241055 |
| SRR7648625           | SRR1945440 | SRR1945752                  | SRR1946064 | SRR1946376          | ERR2241056 |
| SRR7648626           | SRR1945441 | SRR1945753                  | SRR1946065 | SRR1946377          | ERR2241057 |
| SRR7648627           | SRR1945442 | SRR1945754                  | SRR1946066 | SRR1946378          | ERR2241058 |
| SRR7648628           | SRR1945443 | SRR1945755                  | SRR1946067 | SRR1946379          | ERR2241059 |
| SRR7648629           | SRR1945444 | SRR1945756                  | SRR1946068 | SRR1946380          | ERR2241060 |
| SRR7648630           | SRR1945445 | SRR1945757                  | SRR1946069 | SRR1946381          | ERR2242620 |
| SRR7648632           | SRR1945446 | SRR1945758                  | SRR1946070 | SRR1946382          | ERR2242621 |
| SRR7648633           | SRR1945447 | SRR1945759                  | SRR1946071 | SRR1946383          | ERR2242622 |
| SRR7648634           | SRR1945448 | SRR1945760                  | SRR1946072 | SRR1946384          | ERR2242624 |
| SRR7648636           | SRR1945449 | SRR1945761                  | SRR1946073 | SRR1946385          | ERR2242626 |
| SRR7648637           | SRR1945450 | SRR1945762                  | SRR1946074 | SRR1946386          | ERR2245516 |
| SRR7648638           | SRR1945451 | SRR1945763                  | SRR1946075 | SRR1946387          | ERR2245517 |
| SRR7648639           | SRR1945452 | SRR1945764                  | SRR1946076 | SRR1946388          | ERR2245518 |
| SRR7648640           | SRR1945453 | SRR1945765                  | SRR1946077 | SRR1946389          | ERR2245519 |
| SRR7648643           | SRR1945454 | SRR1945766                  | SRR1946078 | SRR1946390          | ERR2245520 |
| SRR7648644           | SRR1945455 | SRR1945767                  | SRR1946079 | SRR1946391          | ERR2245523 |
| SRR7648645           | SRR1945456 | SRR1945768                  | SRR1946080 | SRR1946392          | ERR2245524 |
| SRR7648648           | SRR1945457 | SRR1945769                  | SRR1946081 | SRR1946393          | ERR2245525 |
| SRR7648649           | SRR1945458 | SRR1945770                  | SRR1946082 | SRR1946394          | ERR2245527 |
| SRR7648651           | SRR1945459 | SRR1945771                  | SRR1946083 | SRR1946395          | ERR2245528 |
| SRR7648652           | SRR1945460 | SRR1945772                  | SRR1946084 | SRR1946396          | ERR2245529 |
| SRR7648653           | SRR1945461 | SRR1945773                  | SRR1946085 | SRR1946397          | ERR2245530 |
| SRR7648654           | SRR1945462 | SRR1945774                  | SRR1946086 | SRR1946398          | ERR2245531 |
| SRR7648655           | SRR1945463 | SRR1945775                  | SRR1946087 | SRR1946399          | ERR2245533 |
| SRR7648656           | SRR1945464 | SRR1945776                  | SRR1946088 | SRR1946400          | ERR2245534 |
| SRR7648659           | SRR1945465 | SRR1945777                  | SRR1946089 | SRR1946401          | ERR2245535 |
| SRR7648660           | SRR1945466 | SRR1945778                  | SRR1946090 | SRR1946402          | ERR2245536 |
| SRR7648661           | SRR1945467 | SRR1945779                  | SRR1946091 | SRR1946403          | ERR2245537 |
| SRR7648662           | SRR1945468 | SRR1945780                  | SRR1946092 | SRR1946404          | ERR2245538 |
| SRR7648663           | SRR1945469 | SRR1945781                  | SRR1946093 | SRR1946405          | ERR2245539 |
| SRR7648664           | SRR1945470 | SRR1945782                  | SRR1946094 | SRR1946406          | ERR2245543 |
| SRR7648665           | SRR1945471 | SRR1945783                  | SRR1946095 | SRR1946407          | ERR2245544 |
| SRR7648666           | SRR1945472 | SRR1945784                  | SRR1946096 | SRR1946408          | ERR2245545 |
| SRR7648667           | SRR1945473 | SRR1945785                  | SRR1946097 | SRR1946409          | ERR2245546 |
| SRR7648668           | SRR1945474 | SRR1945786                  | SRR1946098 | SRR1946410          | ERR2245547 |
| SRR7648669           | SRR1945475 | SRR1945787                  | SRR1946099 | SRR1946411          |            |

---

|            |            |            |            |            |
|------------|------------|------------|------------|------------|
| SRR7648670 | SRR1945476 | SRR1945788 | SRR1946100 | SRR1946412 |
| SRR7648672 | SRR1945477 | SRR1945789 | SRR1946101 | SRR1946413 |
| SRR7648673 | SRR1945478 | SRR1945790 | SRR1946102 | SRR1946414 |
| SRR7648674 | SRR1945479 | SRR1945791 | SRR1946103 | SRR1946415 |
| SRR7648675 | SRR1945480 | SRR1945792 | SRR1946104 | SRR1946416 |
| SRR7648677 | SRR1945481 | SRR1945793 | SRR1946105 | SRR1946417 |
| SRR7648678 | SRR1945482 | SRR1945794 | SRR1946106 | SRR1946418 |
| SRR7648679 | SRR1945483 | SRR1945795 | SRR1946107 | SRR1946419 |
| SRR7648680 | SRR1945484 | SRR1945796 | SRR1946108 | SRR1946420 |
| SRR7648681 | SRR1945485 | SRR1945797 | SRR1946109 | SRR1946421 |
| SRR7648682 | SRR1945486 | SRR1945798 | SRR1946110 | SRR1946422 |
| SRR7648683 | SRR1945487 | SRR1945799 | SRR1946111 | SRR1946423 |
| SRR7648684 | SRR1945488 | SRR1945800 | SRR1946112 | SRR1946424 |
| SRR7648686 | SRR1945489 | SRR1945801 | SRR1946113 | SRR1946425 |
| SRR7648688 | SRR1945490 | SRR1945802 | SRR1946114 | SRR1946426 |
| SRR7648689 | SRR1945491 | SRR1945803 | SRR1946115 | SRR1946427 |
| SRR7648690 | SRR1945492 | SRR1945804 | SRR1946116 | SRR1946428 |
| SRR7648691 | SRR1945493 | SRR1945805 | SRR1946117 | SRR1946429 |
| SRR7648692 | SRR1945494 | SRR1945806 | SRR1946118 | SRR1946430 |
| SRR7648693 | SRR1945495 | SRR1945807 | SRR1946119 | SRR1946431 |
| SRR7648694 | SRR1945496 | SRR1945808 | SRR1946120 | SRR1946432 |
| SRR7648696 | SRR1945497 | SRR1945809 | SRR1946121 | SRR1946433 |
| SRR7648699 | SRR1945498 | SRR1945810 | SRR1946122 | SRR1946434 |
| SRR7648700 | SRR1945499 | SRR1945811 | SRR1946123 | SRR1946435 |
| SRR7648701 | SRR1945500 | SRR1945812 | SRR1946124 | SRR1946436 |
| SRR7648702 | SRR1945501 | SRR1945813 | SRR1946125 | SRR1946437 |
| SRR7648703 | SRR1945502 | SRR1945814 | SRR1946126 | SRR1946438 |
| SRR7648704 | SRR1945503 | SRR1945815 | SRR1946127 | SRR1946439 |
| SRR7648705 | SRR1945504 | SRR1945816 | SRR1946128 | SRR1946440 |
| SRR7648706 | SRR1945505 | SRR1945817 | SRR1946129 | SRR1946441 |
| SRR7648709 | SRR1945506 | SRR1945818 | SRR1946130 | SRR1946442 |
| SRR7648710 | SRR1945507 | SRR1945819 | SRR1946131 | SRR1946443 |
| SRR7648711 | SRR1945508 | SRR1945820 | SRR1946132 | SRR1946444 |
| SRR7648717 | SRR1945509 | SRR1945821 | SRR1946133 | SRR1946445 |
| SRR7648718 | SRR1945510 | SRR1945822 | SRR1946134 | SRR1946446 |
| SRR7648721 | SRR1945511 | SRR1945823 | SRR1946135 | SRR1946447 |
| SRR7648722 | SRR1945512 | SRR1945824 | SRR1946136 | SRR1946448 |
| SRR7648724 | SRR1945513 | SRR1945825 | SRR1946137 | SRR1946449 |
| SRR7648725 | SRR1945514 | SRR1945826 | SRR1946138 | SRR1946450 |
| SRR7648726 | SRR1945515 | SRR1945827 | SRR1946139 | SRR1946451 |
| SRR7648727 | SRR1945516 | SRR1945828 | SRR1946140 | SRR1946452 |
| SRR7648728 | SRR1945517 | SRR1945829 | SRR1946141 | SRR1946453 |
| SRR7648729 | SRR1945518 | SRR1945830 | SRR1946142 | SRR1946454 |
| SRR7648730 | SRR1945519 | SRR1945831 | SRR1946143 | SRR1946455 |

---

---

|            |            |            |            |            |
|------------|------------|------------|------------|------------|
| SRR7648731 | SRR1945520 | SRR1945832 | SRR1946144 | SRR1946456 |
| SRR7648733 | SRR1945521 | SRR1945833 | SRR1946145 | SRR1946457 |
| SRR7648734 | SRR1945522 | SRR1945834 | SRR1946146 | SRR1946458 |
| SRR7648740 | SRR1945523 | SRR1945835 | SRR1946147 | SRR1946459 |
| SRR7648743 | SRR1945524 | SRR1945836 | SRR1946148 | SRR1946460 |
| SRR7648744 | SRR1945525 | SRR1945837 | SRR1946149 | SRR1946461 |
| SRR7648745 | SRR1945526 | SRR1945838 | SRR1946150 | SRR1946462 |
| SRR7648746 | SRR1945527 | SRR1945839 | SRR1946151 | SRR1946463 |
| SRR7648747 | SRR1945528 | SRR1945840 | SRR1946152 | SRR1946464 |
| SRR7648748 | SRR1945529 | SRR1945841 | SRR1946153 | SRR1946465 |
| SRR7648750 | SRR1945530 | SRR1945842 | SRR1946154 | SRR1946466 |
| SRR7648751 | SRR1945531 | SRR1945843 | SRR1946155 | SRR1946467 |
| SRR7648752 | SRR1945532 | SRR1945844 | SRR1946156 | SRR1946468 |
| SRR7648753 | SRR1945533 | SRR1945845 | SRR1946157 | SRR1946469 |
| SRR7648754 | SRR1945534 | SRR1945846 | SRR1946158 | SRR1946470 |
| SRR7648756 | SRR1945535 | SRR1945847 | SRR1946159 | SRR1946471 |
| SRR7648757 | SRR1945536 | SRR1945848 | SRR1946160 | SRR1946472 |
| SRR7648758 | SRR1945537 | SRR1945849 | SRR1946161 | SRR1946473 |
| SRR7648759 | SRR1945538 | SRR1945850 | SRR1946162 | SRR1946474 |
| SRR7648761 | SRR1945539 | SRR1945851 | SRR1946163 | SRR1946475 |
| SRR7648762 | SRR1945540 | SRR1945852 | SRR1946164 | SRR1946476 |
| SRR7648763 | SRR1945541 | SRR1945853 | SRR1946165 | SRR1946477 |
| SRR7648765 | SRR1945542 | SRR1945854 | SRR1946166 | SRR1946478 |
| SRR7648766 | SRR1945543 | SRR1945855 | SRR1946167 | SRR1946479 |
| SRR7648767 | SRR1945544 | SRR1945856 | SRR1946168 | SRR1946480 |
| SRR7648768 | SRR1945545 | SRR1945857 | SRR1946169 | SRR1946481 |
| SRR7648769 | SRR1945546 | SRR1945858 | SRR1946170 | SRR1946482 |
| SRR7648771 | SRR1945547 | SRR1945859 | SRR1946171 | SRR1946483 |
| SRR7648772 | SRR1945548 | SRR1945860 | SRR1946172 | SRR1946484 |
| SRR7648773 | SRR1945549 | SRR1945861 | SRR1946173 | SRR1946485 |
| SRR7648774 | SRR1945550 | SRR1945862 | SRR1946174 | SRR1946486 |
| SRR7648775 | SRR1945551 | SRR1945863 | SRR1946175 | SRR1946487 |
| SRR7648776 | SRR1945552 | SRR1945864 | SRR1946176 | SRR1946488 |
| SRR7648777 | SRR1945553 | SRR1945865 | SRR1946177 | SRR1946489 |
| SRR7648779 | SRR1945554 | SRR1945866 | SRR1946178 | SRR1946490 |
| SRR7648781 | SRR1945555 | SRR1945867 | SRR1946179 | SRR1946491 |
| SRR7648782 | SRR1945556 | SRR1945868 | SRR1946180 | SRR1946492 |
| SRR7648783 | SRR1945557 | SRR1945869 | SRR1946181 | SRR1946493 |
| SRR7648784 | SRR1945558 | SRR1945870 | SRR1946182 | SRR1946494 |
| SRR7648785 | SRR1945559 | SRR1945871 | SRR1946183 | SRR1946495 |
| SRR7648789 | SRR1945560 | SRR1945872 | SRR1946184 | SRR1946496 |
| SRR7648790 | SRR1945561 | SRR1945873 | SRR1946185 | SRR1946497 |
| SRR7648791 | SRR1945562 | SRR1945874 | SRR1946186 | SRR1946498 |
| SRR7648792 | SRR1945563 | SRR1945875 | SRR1946187 | SRR1946499 |

---

---

|            |            |            |            |            |
|------------|------------|------------|------------|------------|
| SRR7648795 | SRR1945564 | SRR1945876 | SRR1946188 | SRR1946500 |
| SRR7648796 | SRR1945565 | SRR1945877 | SRR1946189 | SRR1946501 |
| SRR7648797 | SRR1945566 | SRR1945878 | SRR1946190 | SRR1946502 |
| SRR7648798 | SRR1945567 | SRR1945879 | SRR1946191 | SRR1946503 |
| SRR7648800 | SRR1945568 | SRR1945880 | SRR1946192 | SRR1946504 |
| SRR7648801 | SRR1945569 | SRR1945881 | SRR1946193 | SRR1946505 |
| SRR7648804 | SRR1945570 | SRR1945882 | SRR1946194 | SRR1946506 |
| SRR7648806 | SRR1945571 | SRR1945883 | SRR1946195 | SRR1946507 |
| SRR7648807 | SRR1945572 | SRR1945884 | SRR1946196 | SRR1946508 |
| SRR7648809 | SRR1945573 | SRR1945885 | SRR1946197 | SRR1946509 |
| SRR7648811 | SRR1945574 | SRR1945886 | SRR1946198 | SRR1946510 |
| SRR7648812 | SRR1945575 | SRR1945887 | SRR1946199 | SRR1946511 |
| SRR7648817 | SRR1945576 | SRR1945888 | SRR1946200 | SRR1946512 |
| SRR7648818 | SRR1945577 | SRR1945889 | SRR1946201 | SRR1946513 |
| SRR7648819 | SRR1945578 | SRR1945890 | SRR1946202 | SRR1946514 |
| SRR7648821 | SRR1945579 | SRR1945891 | SRR1946203 | SRR1946515 |
| SRR7648822 | SRR1945580 | SRR1945892 | SRR1946204 | SRR1946516 |
| SRR7648824 | SRR1945581 | SRR1945893 | SRR1946205 | SRR1946517 |
| SRR7648825 | SRR1945582 | SRR1945894 | SRR1946206 | SRR1946518 |
| SRR7648826 | SRR1945583 | SRR1945895 | SRR1946207 | SRR1946519 |
| SRR7648828 | SRR1945584 | SRR1945896 | SRR1946208 | SRR1946520 |
| SRR7648829 | SRR1945585 | SRR1945897 | SRR1946209 | SRR1946521 |
| SRR7648830 | SRR1945586 | SRR1945898 | SRR1946210 | SRR1946522 |
| SRR7648831 | SRR1945587 | SRR1945899 | SRR1946211 | SRR1946523 |
| SRR7648832 | SRR1945588 | SRR1945900 | SRR1946212 | SRR1946524 |
| SRR7648833 | SRR1945589 | SRR1945901 | SRR1946213 | SRR1946525 |
| SRR7648834 | SRR1945590 | SRR1945902 | SRR1946214 | SRR1946526 |
| SRR7648835 | SRR1945591 | SRR1945903 | SRR1946215 | SRR1946527 |
| SRR7648836 | SRR1945592 | SRR1945904 | SRR1946216 | SRR1946528 |
| SRR7648837 | SRR1945593 | SRR1945905 | SRR1946217 | SRR1946529 |
| SRR7648838 | SRR1945594 | SRR1945906 | SRR1946218 | SRR1946530 |
| SRR7648839 | SRR1945595 | SRR1945907 | SRR1946219 | SRR1946531 |
| SRR7648840 | SRR1945596 | SRR1945908 | SRR1946220 | SRR1946532 |
| SRR7648843 | SRR1945597 | SRR1945909 | SRR1946221 | SRR1946533 |
| SRR7648848 | SRR1945598 | SRR1945910 | SRR1946222 | SRR1946534 |
| SRR7648852 | SRR1945599 | SRR1945911 | SRR1946223 | SRR1946535 |
| SRR7648854 | SRR1945600 | SRR1945912 | SRR1946224 | SRR1946536 |
| SRR7648855 | SRR1945601 | SRR1945913 | SRR1946225 | SRR1946537 |
| SRR7648858 | SRR1945602 | SRR1945914 | SRR1946226 | SRR1946538 |
| SRR7648860 | SRR1945603 | SRR1945915 | SRR1946227 | SRR1946539 |
| SRR7648863 | SRR1945604 | SRR1945916 | SRR1946228 | SRR1946540 |
| SRR7648866 | SRR1945605 | SRR1945917 | SRR1946229 | SRR1946541 |
| SRR7648868 | SRR1945606 | SRR1945918 | SRR1946230 | SRR1946542 |
| SRR7648873 | SRR1945607 | SRR1945919 | SRR1946231 | SRR1946543 |

---

---

|            |            |            |            |            |
|------------|------------|------------|------------|------------|
| SRR7648874 | SRR1945608 | SRR1945920 | SRR1946232 | SRR1946544 |
| SRR7648876 | SRR1945609 | SRR1945921 | SRR1946233 | SRR1946545 |
| SRR7648877 | SRR1945610 | SRR1945922 | SRR1946234 | SRR1946546 |
| SRR7648878 | SRR1945611 | SRR1945923 | SRR1946235 | SRR1946547 |
| SRR7648881 | SRR1945612 | SRR1945924 | SRR1946236 | SRR1946548 |
| SRR7648882 | SRR1945613 | SRR1945925 | SRR1946237 | SRR1946549 |
| SRR7648883 | SRR1945614 | SRR1945926 | SRR1946238 | SRR1946550 |
| SRR7648884 | SRR1945615 | SRR1945927 | SRR1946239 | SRR1946551 |
| SRR7648885 | SRR1945616 | SRR1945928 | SRR1946240 | SRR1946552 |
| SRR7648888 | SRR1945617 | SRR1945929 | SRR1946241 | SRR1946553 |
| SRR7648889 | SRR1945618 | SRR1945930 | SRR1946242 | SRR1946554 |
| SRR7648890 | SRR1945619 | SRR1945931 | SRR1946243 | SRR1946555 |
| SRR7648894 | SRR1945620 | SRR1945932 | SRR1946244 | SRR1946556 |
| SRR7648896 | SRR1945621 | SRR1945933 | SRR1946245 | SRR1946557 |
| SRR7648897 | SRR1945622 | SRR1945934 | SRR1946246 | SRR1946558 |
| SRR7648899 | SRR1945623 | SRR1945935 | SRR1946247 | SRR1946559 |
| SRR7648903 | SRR1945624 | SRR1945936 | SRR1946248 | SRR1946560 |
| SRR7648906 | SRR1945625 | SRR1945937 | SRR1946249 | SRR1946561 |
| SRR7648911 | SRR1945626 | SRR1945938 | SRR1946250 | SRR1946562 |
| SRR7648917 | SRR1945627 | SRR1945939 | SRR1946251 | SRR1946563 |
| SRR7648918 | SRR1945628 | SRR1945940 | SRR1946252 | SRR1946564 |
| SRR7648919 | SRR1945629 | SRR1945941 | SRR1946253 | SRR1946565 |
| SRR7648921 | SRR1945630 | SRR1945942 | SRR1946254 | SRR1946566 |
| SRR7648922 | SRR1945631 | SRR1945943 | SRR1946255 | SRR1946567 |
| SRR7648925 | SRR1945632 | SRR1945944 | SRR1946256 | SRR1946568 |
| SRR7648926 | SRR1945633 | SRR1945945 | SRR1946257 | SRR1946569 |
| SRR7648928 | SRR1945634 | SRR1945946 | SRR1946258 |            |
| SRR7648965 | SRR1945635 | SRR1945947 | SRR1946259 |            |
| SRR7648975 | SRR1945636 | SRR1945948 | SRR1946260 |            |
| SRR7648976 | SRR1945637 | SRR1945949 | SRR1946261 |            |
| SRR7648980 | SRR1945638 | SRR1945950 | SRR1946262 |            |
| SRR7648981 | SRR1945639 | SRR1945951 | SRR1946263 |            |
| SRR7648982 | SRR1945640 | SRR1945952 | SRR1946264 |            |
| SRR7649002 | SRR1945641 | SRR1945953 | SRR1946265 |            |
| SRR7649010 | SRR1945642 | SRR1945954 | SRR1946266 |            |
| SRR7649012 | SRR1945643 | SRR1945955 | SRR1946267 |            |
| SRR7649016 | SRR1945644 | SRR1945956 | SRR1946268 |            |
| SRR7649028 | SRR1945645 | SRR1945957 | SRR1946269 |            |
| SRR7649033 | SRR1945646 | SRR1945958 | SRR1946270 |            |
| SRR7649038 | SRR1945647 | SRR1945959 | SRR1946271 |            |
| SRR7649040 | SRR1945648 | SRR1945960 | SRR1946272 |            |
| SRR7649041 | SRR1945649 | SRR1945961 | SRR1946273 |            |
| SRR7649042 | SRR1945650 | SRR1945962 | SRR1946274 |            |
| SRR7649044 | SRR1945651 | SRR1945963 | SRR1946275 |            |

---

---

|            |            |            |            |
|------------|------------|------------|------------|
| SRR7649045 | SRR1945652 | SRR1945964 | SRR1946276 |
| SRR7649055 | SRR1945653 | SRR1945965 | SRR1946277 |
| SRR7649063 | SRR1945654 | SRR1945966 | SRR1946278 |
| SRR7649064 | SRR1945655 | SRR1945967 | SRR1946279 |
| SRR7649065 | SRR1945656 | SRR1945968 | SRR1946280 |
| SRR7649066 | SRR1945657 | SRR1945969 | SRR1946281 |
| SRR7649067 | SRR1945658 | SRR1945970 | SRR1946282 |
| SRR7649068 | SRR1945659 | SRR1945971 | SRR1946283 |
| SRR7649069 | SRR1945660 | SRR1945972 | SRR1946284 |
| SRR7649070 | SRR1945661 | SRR1945973 | SRR1946285 |
| SRR7649071 | SRR1945662 | SRR1945974 | SRR1946286 |
| SRR7649072 | SRR1945663 | SRR1945975 | SRR1946287 |
| SRR7649074 | SRR1945664 | SRR1945976 | SRR1946288 |
| SRR7649075 | SRR1945665 | SRR1945977 | SRR1946289 |
| SRR7649076 | SRR1945666 | SRR1945978 | SRR1946290 |
| SRR7649081 | SRR1945667 | SRR1945979 | SRR1946291 |
| SRR7649082 | SRR1945668 | SRR1945980 | SRR1946292 |
| SRR7649083 | SRR1945669 | SRR1945981 | SRR1946293 |
| SRR7649086 | SRR1945670 | SRR1945982 | SRR1946294 |
| SRR7649087 | SRR1945671 | SRR1945983 | SRR1946295 |
| SRR7649088 | SRR1945672 | SRR1945984 | SRR1946296 |
| SRR7649090 | SRR1945673 | SRR1945985 | SRR1946297 |
| SRR7649092 | SRR1945674 | SRR1945986 | SRR1946298 |
| SRR7649093 | SRR1945675 | SRR1945987 | SRR1946299 |
| SRR7649094 | SRR1945676 | SRR1945988 | SRR1946300 |
| SRR7649095 | SRR1945677 | SRR1945989 | SRR1946301 |
| SRR7649096 | SRR1945678 | SRR1945990 | SRR1946302 |
| SRR7649097 | SRR1945679 | SRR1945991 | SRR1946303 |
| SRR7649098 | SRR1945680 | SRR1945992 | SRR1946304 |
| SRR7649099 | SRR1945681 | SRR1945993 | SRR1946305 |
| SRR7649100 | SRR1945682 | SRR1945994 | SRR1946306 |
| SRR7649101 | SRR1945683 | SRR1945995 | SRR1946307 |
| SRR7649102 | SRR1945684 | SRR1945996 | SRR1946308 |
| SRR7649103 | SRR1945685 | SRR1945997 | SRR1946309 |
| SRR7649104 | SRR1945686 | SRR1945998 | SRR1946310 |
| SRR7649105 | SRR1945687 | SRR1945999 | SRR1946311 |
| SRR7649106 | SRR1945688 | SRR1946000 | SRR1946312 |
| SRR7649107 | SRR1945689 | SRR1946001 | SRR1946313 |
| SRR7649108 | SRR1945690 | SRR1946002 | SRR1946314 |
| SRR7649111 | SRR1945691 | SRR1946003 | SRR1946315 |
| SRR7649112 | SRR1945692 | SRR1946004 | SRR1946316 |
| SRR7649113 | SRR1945693 | SRR1946005 | SRR1946317 |
| SRR7649114 | SRR1945694 | SRR1946006 | SRR1946318 |
| SRR7649115 | SRR1945695 | SRR1946007 | SRR1946319 |

---

---

|            |            |            |            |
|------------|------------|------------|------------|
| SRR7649116 | SRR1945696 | SRR1946008 | SRR1946320 |
| SRR7649117 | SRR1945697 | SRR1946009 | SRR1946321 |
| SRR7649118 | SRR1945698 | SRR1946010 | SRR1946322 |
| SRR7649119 | SRR1945699 | SRR1946011 | SRR1946323 |
| SRR7649120 | SRR1945700 | SRR1946012 | SRR1946324 |
| SRR7649121 | SRR1945701 | SRR1946013 | SRR1946325 |
| SRR7649122 | SRR1945702 | SRR1946014 | SRR1946326 |
| SRR7649123 | SRR1945703 | SRR1946015 | SRR1946327 |
| SRR7649124 | SRR1945704 | SRR1946016 | SRR1946328 |
| SRR7649125 | SRR1945705 | SRR1946017 | SRR1946329 |
| SRR7649126 | SRR1945706 | SRR1946018 | SRR1946330 |
| SRR7649127 | SRR1945707 | SRR1946019 | SRR1946331 |
| SRR7649128 | SRR1945708 | SRR1946020 | SRR1946332 |
| SRR7649129 | SRR1945709 | SRR1946021 | SRR1946333 |
| SRR7649130 | SRR1945710 | SRR1946022 | SRR1946334 |
| SRR7649132 | SRR1945711 | SRR1946023 | SRR1946335 |
| SRR7649133 | SRR1945712 | SRR1946024 | SRR1946336 |
| SRR7649134 | SRR1945713 | SRR1946025 | SRR1946337 |
| SRR7649135 | SRR1945714 | SRR1946026 | SRR1946338 |
| SRR7649136 | SRR1945715 | SRR1946027 | SRR1946339 |
| SRR7649137 | SRR1945716 | SRR1946028 | SRR1946340 |
| SRR7649138 | SRR1945717 | SRR1946029 | SRR1946341 |
| SRR7649139 | SRR1945718 | SRR1946030 | SRR1946342 |
| SRR7649140 | SRR1945719 | SRR1946031 | SRR1946343 |
| SRR7649141 | SRR1945720 | SRR1946032 | SRR1946344 |
| SRR7649142 | SRR1945721 | SRR1946033 | SRR1946345 |
| SRR7649143 | SRR1945722 | SRR1946034 | SRR1946346 |
| SRR7649144 | SRR1945723 | SRR1946035 | SRR1946347 |
| SRR7649145 | SRR1945724 | SRR1946036 | SRR1946348 |
| SRR7649146 | SRR1945725 | SRR1946037 | SRR1946349 |
| SRR7649147 | SRR1945726 | SRR1946038 | SRR1946350 |
| SRR7649148 | SRR1945727 | SRR1946039 | SRR1946351 |
| SRR7649149 | SRR1945728 | SRR1946040 | SRR1946352 |
| SRR7649150 | SRR1945729 | SRR1946041 | SRR1946353 |
| SRR7649151 | SRR1945730 | SRR1946042 | SRR1946354 |
| SRR7649152 | SRR1945731 | SRR1946043 | SRR1946355 |
| SRR7649153 | SRR1945732 | SRR1946044 | SRR1946356 |
| SRR7649154 | SRR1945733 | SRR1946045 | SRR1946357 |
| SRR7649156 | SRR1945734 | SRR1946046 | SRR1946358 |
| SRR7649157 | SRR1945735 | SRR1946047 | SRR1946359 |
| SRR7649158 | SRR1945736 | SRR1946048 | SRR1946360 |
| SRR7649159 | SRR1945737 | SRR1946049 | SRR1946361 |
| SRR7649160 | SRR1945738 | SRR1946050 | SRR1946362 |
| SRR7649161 | SRR1945739 | SRR1946051 | SRR1946363 |

---

---

|            |            |            |            |
|------------|------------|------------|------------|
| SRR7649188 | SRR1945740 | SRR1946052 | SRR1946364 |
| SRR7741067 | SRR1945741 | SRR1946053 | SRR1946365 |
| SRR7741068 | SRR1945742 | SRR1946054 | SRR1946366 |
| SRR7784449 | SRR1945743 | SRR1946055 | SRR1946367 |
| SRR7784450 | SRR1945744 | SRR1946056 | SRR1946368 |
| SRR7784451 | SRR1945745 | SRR1946057 | SRR1946369 |
| SRR7818935 | SRR1945746 | SRR1946058 | SRR1946370 |

---



Table S2 Transition and transversion rate in organelle genomes of each species.

| Mutation Type | Mitochondrial |              |                    | Plastid       |              |                    |
|---------------|---------------|--------------|--------------------|---------------|--------------|--------------------|
|               | <i>Ginkgo</i> | <i>Oryza</i> | <i>Arabidopsis</i> | <i>Ginkgo</i> | <i>Oryza</i> | <i>Arabidopsis</i> |
| AG            | 79            | 145          | 288                | 27            | 31           | 445                |
| CT            | 125           | 170          | 231                | 29            | 27           | 430                |
| AC            | 30            | 75           | 315                | 38            | 17           | 418                |
| AT            | 4             | 60           | 63                 | 8             | 16           | 311                |
| CG            | 23            | 61           | 94                 | 2             | 20           | 199                |
| GT            | 32            | 86           | 303                | 44            | 17           | 482                |
| Transition    | 204           | 315          | 519                | 56            | 58           | 875                |
| Transversion  | 89            | 282          | 775                | 92            | 70           | 1,410              |
| Total         | 293           | 597          | 1,294              | 148           | 128          | 2,285              |
